# Supplementary material
Source: PubMed Central journal article supplement (PMC5737635)
Supplement: NIHMS903279-supplement-1.pdf [file NIHMS903279-supplement-1.pdf]

## Supplemental Information

### **A MODULAR PLATFORM FOR DIFFERENTIATION OF HUMAN PSCS INTO ALL MAJOR ECTODERMAL LINEAGES**

Jason Tchieu, Bastian Zimmer, Faranak Fattahi, Sadaf Amin, Nadja Zeltner, Shuibing Chen and Lorenz Studer

## Supplemental Information Inventory

### Supplemental Figures S1-S7

Figure S1, related to Figure 1

Figure S2, related to Figure 1

Figure S3, related to Figure 2

Figure S4, related to Figure 3

Figure S5, related to Figure 5

Figure S6, related to Figure 6

Figure S7, related to Figure 7

### Supplemental Table S1

Table S1, related to Figure 4
